1 Andrea Tovar-Aguilar <sup>a</sup>, Daniel Grimanelli <sup>b</sup>, Gerardo Acosta-García <sup>c</sup>, Jean-Philippe Vielle-  
2 Calzada <sup>d</sup>, Jesús Agustín Badillo-Corona <sup>a</sup> and Noé Durán-Figueroa <sup>a,1</sup>

3  
4 <sup>a</sup> Instituto Politécnico Nacional, Unidad Profesional Interdisciplinaria de Biotecnología, Mexico  
5 City, Mexico.

6 <sup>b</sup> Institut de Recherche pour le Développement, Plant Genome and Development Laboratory,  
7 UMR5096, 34394 Montpellier, France

8 <sup>c</sup> Departamento de Bioquímica. Instituto Tecnológico de Celaya, Celaya, Guanajuato, Mexico.

9 <sup>d</sup> Grupo de Desarrollo Reproductivo y Apomixis, Unidad de Genómica Avanzada, Laboratorio  
10 Nacional de Genómica para la Biodiversidad (LANGEBIO), Centro de Investigación y de Estudios  
11 Avanzados del Instituto Politécnico Nacional (CINVESTAV-IPN), Irapuato, Guanajuato, Mexico.

12

13 <sup>1</sup> To whom correspondence should be addressed. Email: [nduranf@ipn.mx](mailto:nduranf@ipn.mx)

14

15 **Title:** *MIR822* modulates monosporic female gametogenesis through an ARGONAUTE9-  
16 dependent pathway in *Arabidopsis thaliana*.

17

18

19

20 **Keywords**

21 miRNA, female gametogenesis, ARGONAUTE, Arabidopsis, monosporic development

22

23

24

25

26

27

28

29

30

## 31 **ABSTRACT**

32  
33 In the ovule of flowering plants, the establishment of the haploid generation occurs when a somatic  
34 subepidermal cell specified as the gametophytic precursor differentiates into a Megaspore Mother  
35 Cell (MMC) and initiates meiosis. As most flowering plants, *Arabidopsis thaliana* (Arabidopsis)  
36 undergoes a monosporic type of gametogenesis as three meiotically derived cells degenerate  
37 without further division, and a single one – the functional megaspore (FM) - divides mitotically to  
38 form the female gametophyte. The genetic basis and molecular mechanisms that control  
39 monosporic gametogenesis remain largely unknown. In Arabidopsis, ARGONAUTE proteins are  
40 involved the control of megasporogenesis. In particular, mutations in ARGONAUTE9 (AGO9)  
41 lead to the ectopic differentiation of gametic precursors that can give rise to apomeiotically derived  
42 female gametophytes. Here, we show that Arabidopsis plants carrying loss-of-function mutations  
43 in the AGO9-interacting microRNA miR822a give rise to extranumerary surviving megaspores  
44 that acquire a FM identity and divide without giving rise to differentiated female gametophytes.  
45 The overexpression of three miR822a target genes encoding Cysteine/Histidine-Rich C1 domain  
46 proteins (At5g02350, At5g02330 and At2g13900) results in defects equivalent to those found in  
47 *mir822* plants. All three miR822a targets are overexpressed in *ago9* mutant ovules, confirming that  
48 miR822a acts through an AGO9-dependent pathway to negatively regulate Cysteine/Histidine-  
49 Rich C1 domain proteins and restricts the survival of meiotically derived cells to a single  
50 megaspore. Our results identify a microRNA-dependent mechanism that is involved in the control  
51 of megaspore degeneration and the most prevalent form of female gametogenesis in flowering  
52 plants.

53

54

## 55 **INTRODUCTION**

56 The life cycle of flowering plants comprises two major stages, the diploid sporophytic and the  
57 haploid gametophytic generation. During the sporophytic stage, plants develop and give rise to a  
58 mature plant or sporophyte. The female gametophytic phase, which comprises megasporogenesis  
59 and megagametogenesis, takes place inside of the female reproductive organs. Megasporogenesis  
60 comprises three major events: the specification and differentiation of the Megaspore Mother Cell  
61 (MMC), meiosis, and the selection of a single haploid product, the functional megaspore (FM) that

62 will subsequently give rise to the female gametophyte during megagametogenesis (Drews and  
63 Koltunow, 2011). In *Arabidopsis thaliana* (Arabidopsis), the formation of the MMC initiates with  
64 the enlargement of a single sub-epidermal cell that undergoes meiosis and gives rise to four haploid  
65 megaspores, one of which survives and differentiates as the FM. This monosporic pattern of  
66 megaspore formation and survival occurs in more than 70% of flowering plants analyzed to date  
67 (Huang and Russell, 1992, Haig, 2020). Then, during megagametogenesis, the FM divides  
68 mitotically three times without cytokinesis. Cellularization of the resulting eight nuclear *syncytium*  
69 gives rise to a differentiated female gametophyte composed of seven cells: three antipodal cells, a  
70 binucleated central cell, the egg cell, and two synergid cells. Fertilization of both the egg and central  
71 cells triggers a seed developmental program that gives rise to the embryo and endosperm,  
72 respectively, and culminates with the formation of a mature seed (Drews and Koltunow, 2011).

73 Although most flowering plants undergo monospority, there are many species in which more than  
74 one meiotically derived nucleus is incorporated into female gametogenesis, suggesting that key  
75 steps of megasporogenesis including megaspore death or survival, are controlled by dynamic and  
76 variable developmental programs (Schmidt *et al.*, 2015, Pinto *et al.*, 2019). In most species that  
77 follow a monosporic pattern of development, the meiotic nuclear divisions are simultaneous with  
78 cytokinesis; however, in other species such as Arabidopsis, nuclear divisions precede cytokinesis  
79 (Bajon *et al.*, 1999). A tetrad of megaspore nuclei is formed before the deposition of callosic cell  
80 walls covering the three dying but not the functional megaspore, suggesting that cell death is - in  
81 those cases - a consequence of callose-dependent physical isolation (Rodkiewicz, 1970, Webb and  
82 Gunning, 1990). In other species such as *Alisma*, cytokinesis fails after meiosis II, giving rise to  
83 two haploid cells, each containing two haploid nuclei. While one of the binucleated cells dies  
84 without further differentiation, the second one directly incorporates both of its nuclei into a  
85 developing two-nuclear female gametophyte. Finally, in genera such as *Drusa*, cytokinesis is  
86 absent after meiosis II, and all four meiotically derived nuclei are incorporated into a four nuclear  
87 female gametophyte (Webb and Gunning, 1990, Huang and Russell, 1992, Haig, 2020).

88 The genetic basis and molecular mechanisms controlling the formation, death, or survival of  
89 megaspores remain largely unknown. Using ovules of *Medicago sativa*, some have suggested that  
90 programmed cell death (PCD) is the cause of megaspore degeneration (Citterio *et al.*, 2005, Drews  
91 and Koltunow, 2011). Only a few genes involved in the specification of the FM have been

92 identified. In Arabidopsis, in septuple mutants of *INHIBITORS OF CYCLIN-DEPENDENT*  
93 *KINASES (ICK/KRP)* genes (*ick1 ick2 ick3 ick4 ick5 ick6 ick7*), the number and position of  
94 surviving megaspores is variable, indicating that the signals determining survival of megaspore are  
95 affected. Nonetheless, these genes act both during MMC specification and meiosis (Cao *et al.*,  
96 2018). In addition, three other groups of genes involved in the selection of the Arabidopsis FM  
97 have been identified. Overexpression of *ARABINOGALACTAN PROTEIN18 (AGP18)* promotes  
98 positive selection of viable megaspores (Demesa-Arevalo and Vielle-Calzada, 2013). By contrast,  
99 the specification of the FM is lost in triple mutants of *ARABIDOPSIS HISTIDINE KINASE (ahk2–*  
100 *7 ahk3–3 cre1–12)* receptor genes (Cheng *et al.*, 2013). And in *antikevorkian (akv)*, a mutant for  
101 which the molecular lesion remains to be determined, extra-numerary survival megaspores can  
102 give rise to abnormal female gametophytes (Yang and Sundaresan, 2000).

103 MicroRNAs (miRNAs) are 21-22 nucleotide (nt) small non-coding RNAs that, together with  
104 ARGONAUTE (AGO) proteins, regulate gene expression to control diverse developmental  
105 programs in angiosperms (Liu *et al.*, 2018). Briefly, the miRNAs are formed from a primary  
106 transcript that is synthesized by RNA polymerase II, the resulting non-coding single strand  
107 transcript can form a secondary structure hairpin that is usually processed by DICER-LIKE  
108 RNAses that generate double-stranded RNA of 21-22 nt in length. The AGO proteins can bind to  
109 one of the single-stranded molecules of the RNA duplex and target complementary mRNA sites to  
110 either suppress transcription or inhibit translation of the corresponding protein (Armenta-Medina  
111 and Gillmor, 2019). In Arabidopsis, miRNAs have been well characterized during vegetative  
112 development; however, their role during female gametogenesis remain poorly understood. Yet,  
113 genes implicated in the biogenesis of small non-coding RNAs have been linked to early ovule  
114 development; for example, the control of cell specification during megasporogenesis is dependent  
115 on the RNA-directed DNA methylation (RdDM) pathway, that controls female gamete formation  
116 by restricting the specification of pre-meiotic precursors through a silencing mechanism that  
117 involves the activity of sRNAs (Duran-Figueroa and Vielle-Calzada, 2010, Olmedo-Monfil *et al.*,  
118 2010). Dominant mutations in known genes of the RdDM pathway, including ARGONAUTE9  
119 protein, lead to differentiation of multiple female gametic cells that can initiate gametogenesis  
120 without undergoing meiosis by a mechanism reminiscent of apospory (Hernandez-Lagana *et al.*,  
121 2016). Although most AGO9 interactors are 24-nt in length and derived from TEs (Duran-Figueroa  
122 and Vielle-Calzada, 2010), AGO9 protein can also bind to 21-22 nt miRNAs (Havecker *et al.*,

123 2010, Olmedo-Monfil *et al.*, 2010). While several TEs are activated in the egg apparatus in *ago9*  
124 mutant alleles, the role of AGO9 miRNA interactors is still unknown.

125 Here, we analyzed the expression pattern of seven *MIR* genes encoding miRNAs that interact with  
126 AGO9: *MIR161*, *MIR390*, *MIR858*, *MIR867*, *MIR403*, *MIR158* and *MIR822*. We observed that  
127 only *MIR822* showed a defined and specific expression in developing ovules. We genetically  
128 analyzed two Arabidopsis *MIR822* null alleles and showed that developing ovules in homozygous  
129 mutant lines exhibit several meiotically-derived surviving megaspores after meiosis is completed.  
130 Following megasporogenesis, extra-numerary cells acquire FM identity but only one of them  
131 undergoes gametogenesis to form a female gametophyte containing supernumerary nuclei that do  
132 not undergo cellularization or differentiation. The expression of three target genes of miR822a –  
133 *At5g02350*, *At5g02330* and *At2g13900* – is significantly increased in *mir822-1* and *ago9* mutants,  
134 and their overexpression in wild-type lines result in defects equivalent to those found in mutant  
135 *mir822-1*. These results suggest that the AGO9-interactor miR822a modulates monosporic  
136 development in Arabidopsis, thus revealing for the first time the role of a miRNAs in the regulation  
137 of megaspore formation in flowering plants.

138

139

140 **RESULTS**

141 ***MIR822* is specifically expressed in developing ovules.**

142 Previous immunoprecipitation results have demonstrated that AGO9 can bind to a selected group  
143 of miRNAs (Duran-Figueroa and Vielle-Calzada, 2010, Olmedo-Monfil *et al.*, 2010). To determine  
144 if some of these miRNAs could have an AGO9-dependent function for female gametogenesis, we  
145 analyzed the spatial and temporal expression pattern of seven AGO9-interacting miRNAs during  
146 flower development. We performed transcriptional fusions between the transcription regulatory  
147 region of different *MIR* genes and the *uidA* (GUS) reporter gene. For each regulatory region, we  
148 selected at least 500 nt upstream of the first nucleotide at the 5'-end of the predicted miRNA  
149 precursor (Zhou *et al.*, 2007), and analyzed the GUS expression pattern in at least three  
150 independently transformed lines for two consecutive generations. We observed that the promoters  
151 from *MIR390* and *MIR161* drove expression of *uidA* in all reproductive organs throughout  
152 development (Figure 1); however, while *MIR161pro:GUS* lines did not show expression in the  
153 anther, *MIR390pro:GUS* lines showed expression in all regions of male and female reproductive  
154 organs. The promoter of *MIR858* only showed expression in the receptacle and sepals (Figure 1),  
155 whereas the regulatory regions from *MIR867*, *MIR403* and *MIR158* drove expression of *uidA* only  
156 in the anthers (Figure 1). Whereas *MIR867pro:GUS* and *MIR403pro:GUS* lines only showed  
157 expression during floral stages 10 to 12 and 11-12 respectively, *MIR161pro:GUS*,  
158 *MIR390pro:GUS*, *MIR858pro:GUS* and *MIR158pro:GUS* lines maintained expression throughout  
159 flower development. By contrast, *MIR822pro:GUS* lines showed specific expression in the  
160 developing ovules, the expression of the reporter GUS in the ovule initiated at floral stage 11,  
161 corresponding to early stages of megasporogenesis, and remained throughout flower development.

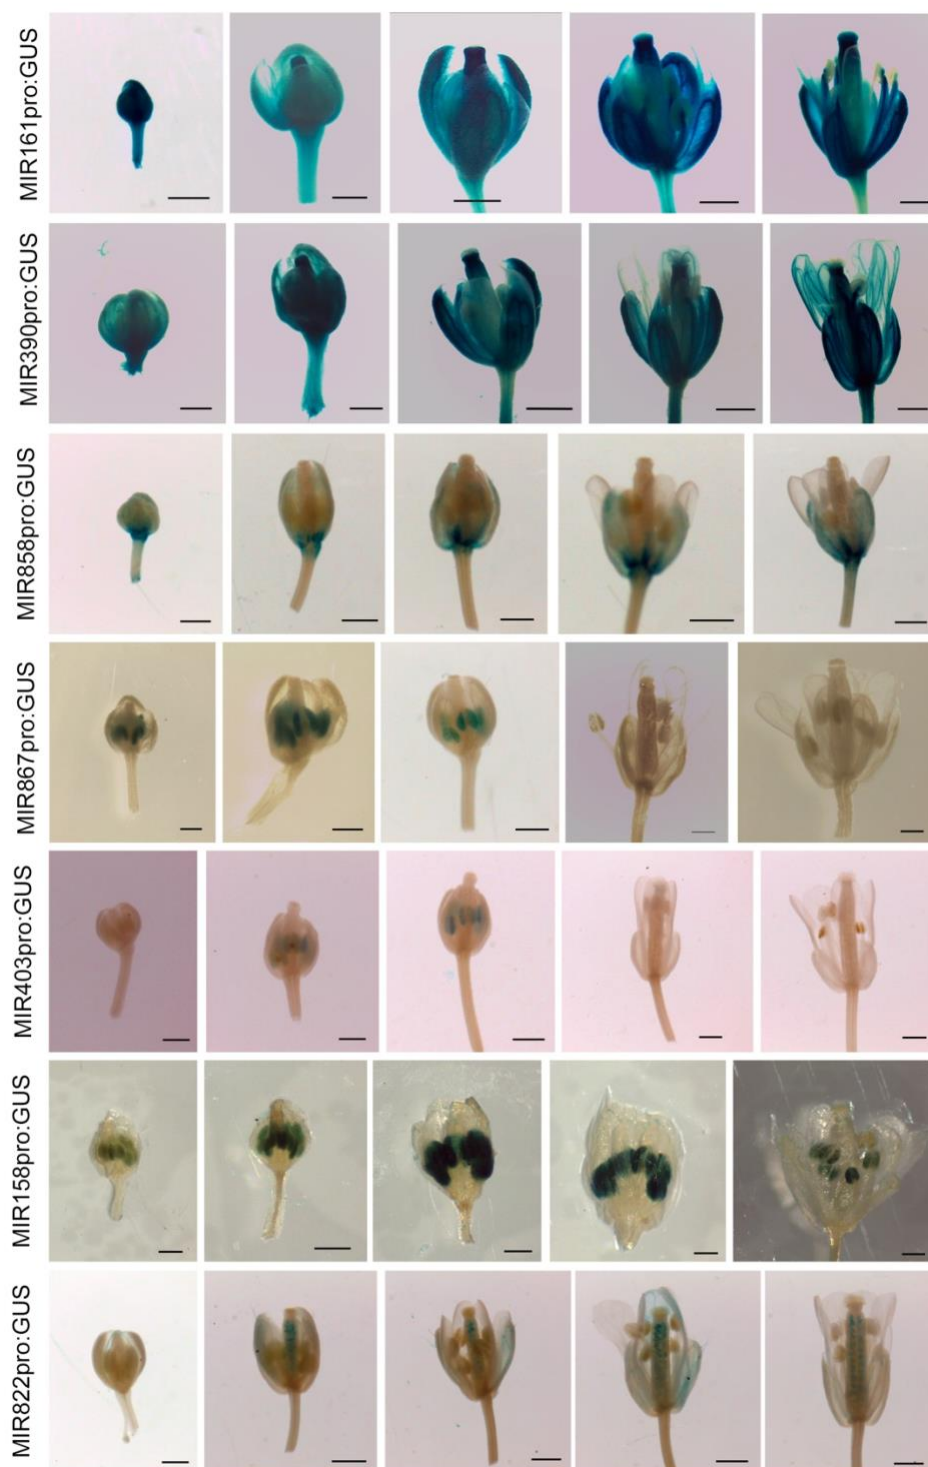

Figure 1. Expression pattern of MIR genes during flower development

162  
163  
164  
165  
166

167 Having observed that the expression of GUS in the *MIR822pro:GUS* lines occurred in the ovules  
168 of the developing flower (Figure 2A), we next sought to follow the expression of the reporter  
169 throughout ovule development. As illustrated in Figure 2, we saw that reporter expression in  
170 *MIR822pro:GUS* lines is absent from the MMC at early stages of differentiation (Figure 2B),  
171 suggesting that *MIR822* is not transcriptionally active during MMC specification. However, during  
172 meiosis, reporter expression starts to be observed in cells of the young inner integuments (Figure  
173 2C) and, at the end of megasporogenesis GUS expression expands to the entire distal pole of the  
174 ovule (micropylar region), including in the developing inner and outer integuments (Figure 2D and  
175 2E), suggesting that sporophytic cells actively participate in the transcription of the *MIR822* gene.  
176 During female gametogenesis, GUS expression is observed in the micropylar region of the ovule  
177 and in the *syncytium* structure, including gametic cells (Figures 2F and 2G). In addition,  
178 *MIR822pro:GUS* lines showed reporter expression in trichomes and seedlings, but not in anthers  
179 or seeds throughout development. These results indicate that the expression of the *MIR822* initiates  
180 at the onset of meiosis during megasporogenesis, and that *MIR822* is active in sporophytic and  
181 gametic cells of the ovule.

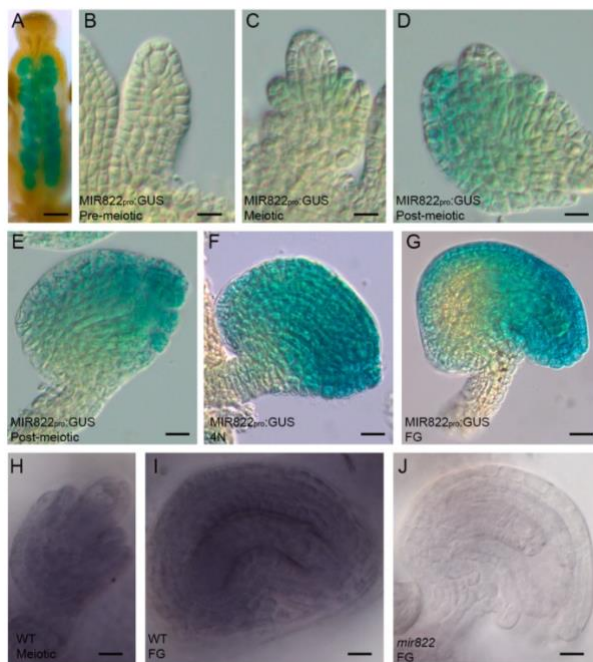

182 Figure 2. miR822a has a specific expression pattern  
183 during ovule development.  
184



185 To determine the spatial-temporal expression pattern of the mature miR822a, we conducted *in situ*  
186 hybridization experiments in wild-type and mutant *mir822* plants. First, we quantitatively assessed  
187 the level of expression of miR822a in wild-type plants and in two insertional mutant lines by qRT-  
188 PCR. One of the mutant lines (Salk\_023928, subsequently named *mir822-1*) has a T-DNA inserted  
189 in nucleotide 77 towards the 3' of the *MIR822* gene, and the other one (Sail\_99\_F11, subsequently  
190 named *mir822-2*) has a T-DNA inserted within the predicted *MIR822* promoter, 613 nt upstream  
191 of the 5' end of miR822a (Supplemental Figure 2). Whereas wild-type plants showed up to 4-fold  
192 change in the expression of miR822a in ovules, gynoecia, and whole mature flowers, ovules from  
193 homozygous *mir822-1* plants showed null expression of the mature miR822a. Conventional RT-  
194 PCR using specific primers to detect the *MIR822* precursor, confirmed that the corresponding non-  
195 coding RNA is absent in the ovules of *mir822-1*. Then, *in situ* hybridization confirmed that the  
196 mature miR822a is localized in the wild-type ovules prior to meiosis and throughout  
197 megagametogenesis (Figure 2H and 2I) including gametic cells, but absent from mutant *mir822-1*  
198 ovules (Figure 2J). Overall, these results confirm the presence of the mature miR822a during  
199 megaspore formation and indicate that *miR822-1* is a mutant allele with no expression of miR822a.

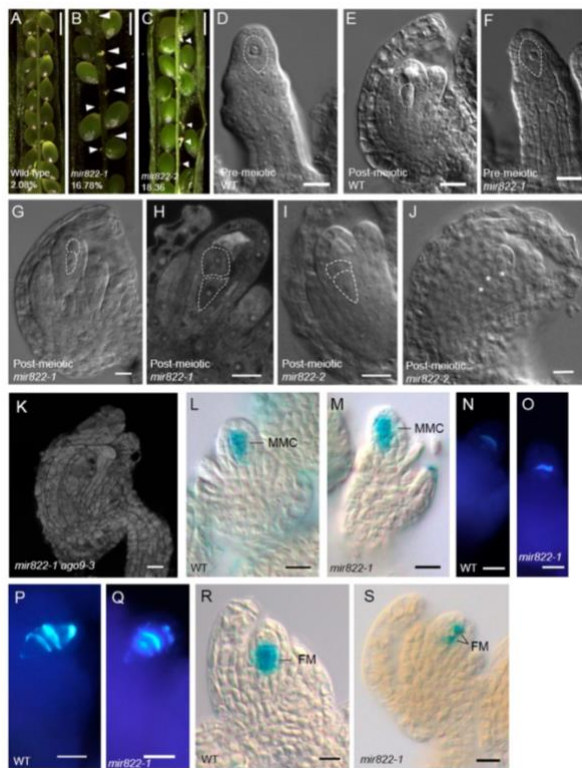

Figure 3. Phenotype of *mir822a* during female gametophyte development

200  
201  
202

203 **Ovules impaired in *MIR822* function show more than one surviving megaspore.**

204 To explore the function of miR822a during female gametogenesis, we investigated if mutant alleles  
205 *mir822-1* and *mir822-2* showed any sign of fertility defects. Thus, we performed quantitative  
206 morphological analysis of young seeds in open siliques and found that homozygous individuals of  
207 both *mir822-1* and *mir822-2* showed a semi-sterile phenotype, with 16.78% and 18.36%,  
208 respectively, of unfertilized ovules aborting before seed maturity (Figure 3A-3C). To determine  
209 the cellular defect that causes this semi-sterile phenotype, we compared ovule development in wild-  
210 type and mutant individuals using whole-mounted cleared specimens under bright field or  
211 confocal microscopy, following previously defined megasporogenetic stages on the basis of  
212 integument formation (Rodriguez-Leal *et al.*, 2015). As expected, in most cases wild type (94.4%;  
213 n=180) ovules differentiated a single MMC that then underwent meiosis to give rise to a unique  
214 functional megaspore (Figure 3D-3E). By contrast, although most homozygous *mir822-1* and  
215 *mir822-2* ovules also differentiated a single pre-meiotic MMC (Figure 3F) (97.5% and 98.07%,  
216 respectively; n=160 and n=260), both mutant alleles showed a high frequency of supernumerary  
217 derived cells aligning in the micropylar-chalzal axis orientation and resembling non-degenerated  
218 meiotic products (Figure 3G to 3J). These supernumerary cells were present from the early stages  
219 of integument formation up to stages in which the outer integument is fully developed and  
220 surrounding the nucellus. In the case of *mir822-1*, 27.69% of developing ovules showed one  
221 additional cell while 7.04% showed two additional cells (n=213). In the case of *mir822-2*, 25.38%  
222 showed one additional cell and 6.73% showed two additional cells. Because miR822 is an  
223 interactor of AGO9 protein, we made the double mutant *mir822-1 ago9-3* to evaluate the genetic  
224 relationship. We observed that in heterozygous plants 33.02% of developing ovules showed one  
225 additional cell (Figure 3K). To determine if supernumerary cells are indeed derived from meiosis  
226 and acquire a gametic identity, we monitored the expression of *DISRUPTION OF MEIOTIC*  
227 *CONTROL1* (*AtDMC1*) and *CIHUATEOTL* (*CIH*; At4g38150) in ovules of the *mir822-1* mutant.  
228 Whereas the *AtDMC1* gene is essential for homologous recombination in meiosis and its expression  
229 is located in the MMC (Klimyuk and Jones, 1997, Seeliger *et al.*, 2012), *CIH* encodes a  
230 pentatricopeptide-repeat protein that is specifically expressed in the FM at the onset of female  
231 gametogenesis but, not in the meiotically-derived degenerated megaspores (Sanchez-Leon *et al.*,  
232 2012). We independently crossed transgenic lines carrying a transcriptional reporter fusion of the  
233 *AtDMC1* or pFM2 promoter (pAtDMC1:GUS and pFM2:GUS, respectively) to homozygous

234 *mir822-1* individuals, and histochemically analyzed. Mutant *mir822-1* ovules showed restricted  
235 expression of the pAtDMC1:GUS marker in the MMC, confirming a correct onset of meiosis  
236 (Figure 3L and 3M). Then, to demonstrate if meiotic division were properly carried out, we  
237 monitored the callose deposition with aniline-blue fluorescence (Rodkiewicz, 1970). We  
238 confirmed that in ovules of mutant *mir822-1*, callose deposition occurs in a pattern equivalent to  
239 wild-type during meiosis I, the callose is deposited in the transverse wall of the newly synthesized  
240 cell plate (Figures 3N and 3O). By contrast, following meiosis II, the accumulation of callose in  
241 dying megaspores did not occur in *mir822-1* ovules that only showed callose deposition in cell  
242 walls transversally oriented on the basis of the micropylar-chalazal axis (Figure 3P and 3Q). The  
243 absence of callose deposition in FM adjacent cells is indicative of megaspore survival following  
244 meiosis II. Finally, homozygous *mir822-1* ovules showed pFM2 driven GUS expression in two  
245 adjacent post-meiotic cells, (Figure 3R and 4S), confirming thus that the abnormally surviving cell  
246 acquire the identity of a functional megaspore and are of meiotic origin. Taken together, these  
247 results indicate that *MIR822* is necessary for restricting the survival of meiotically derived cells to  
248 a single functional megaspore. Also, suggest that *MIR822* with *AGO9* modulate the monosporic  
249 female development.

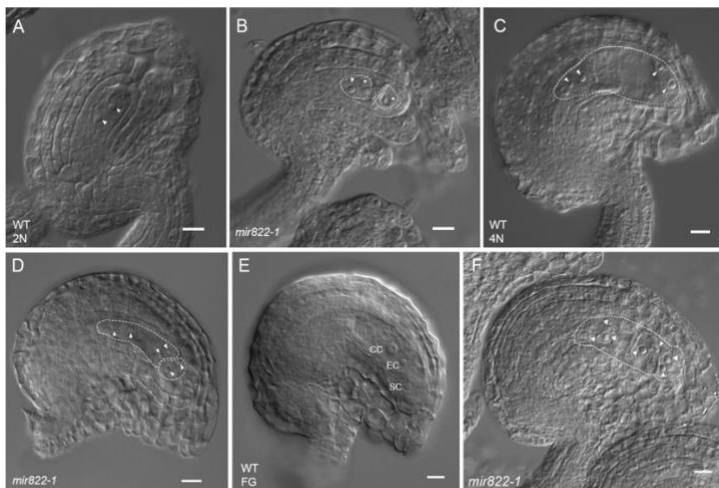

250 Figure 4. Female megagametogenesis in wild-type and *mir822*  
251 mutant ovules

252  
253 To determine if supernumerary FM-like cell is able to subsequently divide and if a female  
254 gametophyte is formed, we cytologically compared female gametogenesis in wild-type and *mir822*  
255 mutant ovules. As in the case of wild-type, homozygous *mir822-1* and *mir822-2* individuals

256 showed a single FM and subsequently a two nuclear (2N) vacuolated female gametophyte  
257 occupying the predicted position, indicating that at this stage of development the abnormally  
258 surviving FM-like cell have not initiated female gametogenesis (Figure 4A and 4B). However,  
259 once the normally dividing female gametophyte reached the four nuclear stage (4N), 31.62%  
260 (n=117) of *mir822-1* and 23.07% (n=117) of *mir822-2* ovules showed an additional 2 nuclear  
261 female gametophyte that did not vacuolate or expand (Figure 4C and 4D). Finally, at stages in  
262 which a fully differentiated female gametophyte is present in the mature ovule (Figure 4E), *mir822-*  
263 *1* plants had 28.92% (n=242) of ovules showing multinuclear female gametophyte with no apparent  
264 cellularization of gametophytic cells (Figure 4F); in the case of *mir822-2*, this frequency was of  
265 26.15% (n=195). These results indicate that in the absence of *MIR822* function, abnormal  
266 surviving megaspores are able to mitotically divide but, not to form a cellularized female  
267 gametophyte.

268  
269 **miR822a target genes are regulated by an AGO9-dependent pathway and his overexpression**  
270 **results in gametophytic defects equivalent to those found in *mir822* plants.**

271 To confirm that the previously described mutant phenotype is caused by the absence of the  
272 miR822a regulatory role during megasporogenesis, we quantitatively assessed the expression of  
273 three miR822a target genes and determined their function during early ovule development. A  
274 combination of high-throughput deep sequencing and RNA ligase-mediated 5' Rapid  
275 Amplification of cDNA ends assays (RLM 5' RACE), has previously showed that three genes  
276 encoding Cysteine/Histidine-Rich C1 domain proteins of unknown function - *At2g13900*,  
277 *At5g02330*, and *At5g02350* – are the targets of miR822a (Addo-Quaye *et al.*, 2008). As illustrated  
278 in Figure 5A, qRT-PCR assays showed that all three genes are overexpressed in homozygous  
279 *mir822-1* ovules as compared to wild-type, confirming their direct regulation by miR822a as  
280 previously suggested by (Shao *et al.*, 2013). Although it is well known that AGO9 protein  
281 preferentially binds 24 nt siRNAs, immunoprecipitation assays had shown that that miR822a is  
282 also an AGO9 interactor (Duran-Figueroa and Vielle-Calzada, 2010, Olmedo-Monfil *et al.*, 2010).  
283 To determine whether AGO9 regulates the expression of these three miR822a target genes, we also  
284 assessed their expression by qRT-PCR in ovules of *ago9-3* homozygous individuals. All three  
285 showed high levels of expression as compared to wild-type ovules (Figure 5B), reaching up to  
286 1000-fold differences in the case of *At2g13900*. These results suggest that miR822a acts through

287 an AGO9-dependent pathway to negatively regulate Cysteine/Histidine-Rich C1 domain proteins  
288 in the ovule.  
289

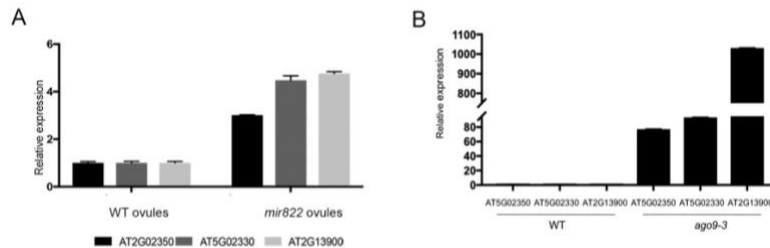

290 Figure 5. The genes AT5G02350, AT5G02330 and AT2G13900 are  
291 downregulated by miR822 and AGO9.  
292

293 To determine if repression of *At2g13900*, *At5g02330* and *At5g02350* is necessary to ensure the  
294 survival of a single megaspore following meiosis, we generated independent transgenic lines  
295 overexpressing each of these three genes under the control of the cauliflower mosaic virus 35S  
296 promoter (CaMV35S). Previous results have shown that the CaMV35S promoter is useful to  
297 elucidate the function of genes acting during megasporogenesis (Demesa-Arevalo and Vielle-  
298 Calzada, 2013). After the generation of three overexpression lines for each target gene, we selected  
299 the transgenic lines with the highest level of overexpression to perform a phenotypic analysis  
300 (Supplementary Figure 3). Similar to *mir822-1* and *mir822-2*, all overexpressing lines showed a  
301 semi-sterile phenotype, with 18.17% (*At5g02350*), 19.33% (*At5g02330*) and 14.6% (*At2g13900*)  
302 of the unfertilized ovules aborting before seed formation (Figure 6A). In all cases, developing  
303 ovules did not show cytological defects prior to meiosis, suggesting that none of these genes has a  
304 role in MMC specification (Figure 6B). By contrast, abnormally surviving megaspores are present  
305 when any of these three genes is overexpressed in the Arabidopsis ovule. Whereas the  
306 overexpression of *At2g13900* resulted in 36.5% (n=82) of ovules showing an additional surviving  
307 megaspore, overexpression of *At5g02330* and *At5g02350* resulted in the same phenotype at  
308 frequencies of 31.6% (n=79) and 31.1% (n=72), respectively. These results demonstrate that the  
309 repression of any of these three miR822a target genes is necessary to maintain monospory in  
310 Arabidopsis, confirming that this AGO9-dependent miRNA regulatory pathway is necessary to

311 inactivate Cysteine/Histidine-Rich C1 domain proteins in the ovule, and restrict the survival of  
312 meiotically derived cells to a single megaspore.

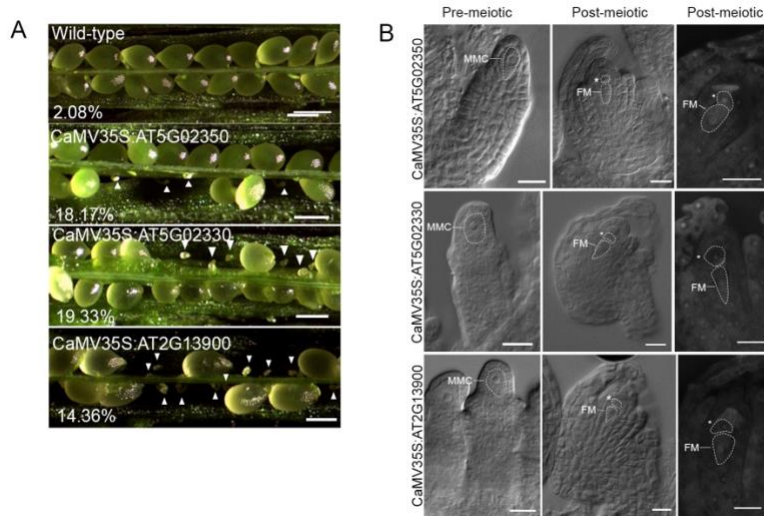

313  
314  
315  
316

Figure 6. Overexpression of genes *AT5G02350*, *AT5G02330* and *AT2G13900* phenocopy the *mir822*.

## 317 DISCUSSION

318 In this paper we have shown that a microRNA modulates monosporic female gametogenesis  
319 through an ARGONAUTE9-dependent pathway in *Arabidopsis thaliana*. We have shown that  
320 AGO9-miRNAs interactors have a particular temporal and spatial expression pattern during flower  
321 development but, evidence suggest that *MIR822* play a key role during early ovule development.  
322 We carried out a cellular and molecular characterization of the *loss-of-function* mutant of *MIR822*  
323 and showed that extranumerary cells survive towards the end of meiosis instead of one, as it occurs  
324 in monosporic development of wild-type plants. By monitoring the AtDMCI::GUS and callose  
325 molecular markers in the *mir822-1* mutant background, we demonstrated that surviving-cells are  
326 products of meiosis but also interestingly, cells acquire FM identity, which we confirmed with the  
327 pFM2 molecular marker. Previously reported degradome and bioinformatic studies, have shown  
328 that miR822a has *AT2G13900*, *AT5G02330* and *AT5G02350* as target genes. We showed that these  
329 three genes are overexpressed in the absence of either miR822a or AGO9 protein, indicating that  
330 the complex AGO9-miR822a negatively regulates the expression of these three genes during ovule  
331 development. Not surprisingly, the overexpression of these three target genes yielded lines that had  
332 a phenotype undistinguishable from the *mir822-1* and *mir822-2* alleles during megasporogenesis.

333 Taken together, our data suggest that an AGO9-miR822a pathway modulates the monosporic  
334 development by restrict the survival of meiotically derived cells to a single megaspore during  
335 megasporogenesis in *Arabidopsis thaliana*.

336 Although the understanding of the mechanisms controlling megasporogenesis are limited, some  
337 new insights have emerged in recent years. Genes controlling early steps of germline fate and  
338 meiosis have been identified by several mutant screens (reviewed by (Erbasol Serbes *et al.*, 2019)).  
339 A substantial amount of data exists that support our current understanding on restriction of MMC  
340 fate, and to a certain extent also about the process governing meiotic division of the MMC (Pinto  
341 *et al.*, 2019). However, much less is known about the mechanisms that ultimately led to the  
342 selection of a FM through the degeneration of three and survival of one megaspore. Questions such  
343 as *how is monosporic development controlled?* or, *how is megaspore death or survival controlled?*  
344 remain largely unanswered. The formation and maturation of the initial cells deriving from meiosis  
345 gives rise to the megaspores, depending on the pattern of cell wall formation, megasporogenesis is  
346 classified into three types based on the number of nuclei incorporated in the resulting female  
347 gametophyte (Rodkiewicz, 1970). The *Polygonum* type of monosporic development prevails in  
348 more than 70% of flowering plants – including *Arabidopsis* – and depends on a single haploid  
349 precursor, usually located at the chalazal pole, giving rise to the female gametophyte. According  
350 to theoretical hypothesis of genetic conflict during megasporogenesis, the monosporic type of  
351 development in the most stable form of female gametogenesis, ensuring the absence of direct  
352 competition among megaspores (Haig, 1990, Bachelier and Friedman, 2011). In some plant  
353 families, the surviving megaspore is located on the distal pole (*Oenothera*), which suggests that  
354 there are positional signals and therefore, there are a spatial determination of megaspores. The  
355 plasticity of developmental patterns observed in angiosperms has allowed to postulate that a failure  
356 in cell division and cytokinesis, can lead to the survival of two or four megaspores, which  
357 correspond to a bisporic (*Allium*, 8-nucleate) or tetrasporic (*Drusa*, 16-nucleate) development,  
358 respectively (Huang and Russell, 1992). In monosporic development of *Arabidopsis thaliana*, the  
359 cytokinesis occurs only after completion of meiosis, sometimes giving rise to a multiplanar tetrad  
360 of megaspores (Webb and Gunning, 1990, Schneitz *et al.*, 1995, Bajon *et al.*, 1999). The  
361 mechanisms that regulate cytokinesis during female gametogenesis are largely unknown. In other  
362 hand, cell-cycle regulators such as genes encoding interactor/inhibitor of cyclin-dependent  
363 kinase/Kip-related proteins (*ICK/KRPs*) have been associated to the degeneration of megaspores

364 (Cao *et al.*, 2018). Other kind of genes located in plasma membrane, that include  
365 *ARABINOGALACTAN PROTEIN18* and *ARABIDOPSIS HISTIDINE KINASE* have been  
366 associated to FM selection (Cheng *et al.*, 2013, Demesa-Arevalo and Vielle-Calzada, 2013); but  
367 their role in degradation or survival is nor clearly understood.

368 Here we show that a miRNA is involved in FM selection at the end of megasporogenesis. Our  
369 results shown that in the *mir822* mutant and the overexpressing lines of the corresponding target  
370 genes, have a bisporic-like development at high frequency. Interestingly, the presence of extra-  
371 numerary megaspores in mutant and overexpresses lines did not give rise to an additional,  
372 differentiated and functional embryonic sac, indicating, perhaps not surprisingly, the existence of  
373 other regulatory elements controlling the stages of female gametophyte development. Remarkably,  
374 the surviving extra FM-like cell is derived from meiosis II and invariably is the cell adjacent to  
375 proximal position, therefore suggesting that elimination of cells is being modulated by a positional  
376 signal. Together with programmed cell death (PCD), positional signals are a developmental  
377 strategy in seed formation to control cell number and identity (Ingram, 2017). Nevertheless, genes  
378 associated with this cellular process and with implications in megasporogenesis have not been  
379 identified to date. We postulate that, miR822a mediates a pathway involved in the cell-elimination  
380 of haploid products after meiosis during megasporogenesis. It is possible then, that miR822a works  
381 like an intercellular signal for triggering PCD during megasporogenesis. Already some decades  
382 ago, it was documented that one hallmarks of megaspores degeneration is the deposition of callose  
383 since this accumulates positionally in those cells destined to die (Rodkiewicz, 1970, Kapil and  
384 Bhatnagar, 1981). In the mutant background of *mir822*, callose signal is clearly observed after cell  
385 division in meiosis I and meiosis II, just as in the wild-type case, but the typical callose deposition  
386 towards the distal pole is not observed in the mutant. Lack of callose has been suggested with the  
387 free flow of small RNAs in the plasmodesmata of the haploid megaspores (Tucker and Koltunow,  
388 2014). Our evidence suggests that the function of miR822a is to induce cell elimination of female  
389 haploid products and thus, allows only one cell to survive to develop the mature and functional  
390 embryo sac in a monosporic type development. Interestingly, the role of miR822a in monosporic  
391 development might be restricted to the Arabidopsis genera, because *MIR822* gene is a non-  
392 conserved MIR gene (Chavez Montes *et al.*, 2014).



393 Although more detailed experiments are necessary, the combination of transcriptional fusions  
394 experiments and *in situ* assay indicates that mature miR822a is located in both sporophytic and  
395 gametophytic cells but, its synthesis apparently is restricted to sporophytic cells, resembling a non-  
396 cell autonomous mechanism (Nonomura, 2018). It has been widely demonstrated that miRNAs and  
397 siRNAs can move over long distances as a mechanism of cellular communication, move also  
398 between cells and act as positional signals (Benkovics and Timmermans, 2014, Liu and Chen,  
399 2018). Our previous studies it has been suggested that TE-derived siRNAs that are loaded by AGO9  
400 restrict the cellular identity of MMC by a non-cell autonomous pathway (Duran-Figueroa and  
401 Vielle-Calzada, 2010, Olmedo-Monfil *et al.*, 2010). Furthermore, it has been shown that a pathway  
402 mediated by a complex siRNA/AGO can promote meiotic division of megaspores (Tucker *et al.*,  
403 2012) and, also has been suggested that a sporophytic source of cytokinin is required for correct  
404 FM specification (Cheng *et al.*, 2013). Therefore, it remains to be clarified if the miR822 moves,  
405 intercellularly from young integuments to gamete precursor cells during megasporogenesis and if  
406 works as positional signal for modulating the monosporic developmental pattern in Arabidopsis.

407 As we have also shown in this paper, expression of, miR403, miR867 or miR57, which are all  
408 AGO9 interactors, is restricted to pollen, opening up a great opportunity to study the role of the  
409 AGO9-miRNA complexes in plant male organ development. Evidence that AGOs works in nucleus  
410 and cytoplasm has been documented (Bologna *et al.*, 2018). Previously published results by our  
411 group have shown that AGO9 is located in both the nucleus and the cytoplasm, particularly in  
412 pollen it is localized in cytoplasmic foci of the vegetative cell (Olmedo-Monfil *et al.*, 2010,  
413 Rodriguez-Leal *et al.*, 2015). It is important to highlight that the miRNAs evaluated in this work  
414 are also interactors of AGO1 (Havecker *et al.*, 2010); however, neither the AGO1 nor the genes  
415 associated with miRNA biogenesis have been associated with megasporogenesis (Hernandez-  
416 Lagana *et al.*, 2016).

417 Finally, an open question to investigate in the future is: *which is the actual function of target genes*  
418 *regulated by miR822a?* The three target genes *AT5G02350*, *AT5G02330* and *AT2G13900* belong  
419 to a huge family of approximately 140 genes in Arabidopsis. These genes contain cysteine- and  
420 histidine- rich zinc finger domain called Divergent C1 (DC1) and, are found exclusively in plants.  
421 The DC1 domain is still poorly understood, few reports have approached them to characterize it  
422 and study its role. The DC1-domain gene called *VACUOLELESS GAMETOPHYTES (VLG)* has

423 been characterized in *Arabidopsis* and shown to be necessary for vacuole formation at early  
424 development in both male and female gametophytes (D'Ippolito *et al.*, 2017). It is very interesting  
425 that in the *mir822* mutant, the classical vacuole that forms at the 2N stage of development is absent.  
426 In *Capsicum annuum*, a gene coding for a protein with DC1 domains has been shown to be involved  
427 in salicylic acid dependent plant defense response and, has also been associated with plant cell  
428 death; additional experiments showed that this protein is capable of binding both DNA and RNA  
429 *in vitro* (Hwang *et al.*, 2014). In cotton, a DC1 domain-containing transcription factor has been  
430 identified as the target of miRNVL5 and the latter as regulator of the plant response to salt stress  
431 (Gao *et al.*, 2016). It would be very interesting to determine whether the genes *AT5G02350*,  
432 *AT5G02330* and *AT2G13900* are transcription factors involved in vacuole formation with  
433 consequences on PCD associated to female gametogenesis in *Arabidopsis thaliana*.

434

## 435 **MATERIALS AND METHODS**

### 436 **Plant Material and culture conditions**

437 Wild-type *Arabidopsis thaliana* Columbia ecotype (Col-0) was used for all experiment involving  
438 transformation. Seeds were surface sterilized in a solution of 60% (v/v) commercial chlorine and  
439 0.005% Tween 20 (Sigma, USA). Seeds were placed in Murashige and Skoog (MS) (Murashige  
440 and Skoog, 1962) medium and incubated for germination in a chamber with long-day (16 h light/8  
441 h dark) conditions at 25°C. Selection of transformed lines was carried out in MS medium  
442 supplemented with kanamycin (50 mg/mL) and using the same environmental conditions already  
443 mentioned. For seed collection, plants were grown under greenhouse conditions at 25°C. All  
444 transgenics plants selected were in the F3 generation. The *mir822-1* (*Salk\_023928*) and the *mir822-*  
445 *2* (*Sail\_99\_F11*) lines were genotyped following the Salk Institute Genomic Analysis Laboratory  
446 instructions, and absence of the pre-miR822 was confirmed by end-point RT-PCR. The  
447 *mir822xpAtDMC1-GUS* and *mir822xpFM2-GUS* were obtained crossing the homozygous  
448 *Salk\_023928* line with each marker line. All primers used for genotyping are listed in  
449 Supplementary Table 1.

450

### 451 **Vectors Construction and transformants generation**

452 The core of the Promoter Region (PR) from MIR genes was selected considering genomic  
453 characteristic according to Zhou and collaborators (Zhou *et al.*, 2007). Each PR, was amplified by

454 PCR from wild-type genomic DNA (Primers used are listed in Supplementary Table 1). Amplified  
455 PRs had the following lengths: for MIR822 (AT5G03552), 884 bp; for MIR390 (AT2G38325) 985  
456 bp; for MIR858 (AT1G71002) 999 bp; for MIR157 (AT1G66783) 1008 bp; for MIR867  
457 (AT4G21362) 1012 bp; for MIR161 (AT1G48267) 999 bp; and for MIR403 (AT2G47275) 1000  
458 bp. The PRs were independently inserted into pBlueScriptII KS (-) and then transferred using  
459 *HindIII* and *XbaI* into binary vector pBI101.3 to generate GUS (*uidA*) fusions. Target genes for  
460 miR822, AT5G02330, AT5G02350 and AT2G13900 genes were amplified by PCR from wild-  
461 type genomic DNA and cloned into donor vector pENTR/TOPO (Invitrogen). The coding  
462 sequences were then transferred to destination vector pGWB2 vector by LR recombination  
463 (Invitrogen) to obtain the transformation vectors carrying the expression cassettes  
464 CaMV35S:AT5G02330, CaMV35S:AT5G02350 and CaMV35S:AT2G13900. *Arabidopsis*  
465 *thaliana* Col-0 was transformed by the floral dip method (Zhang *et al.*, 2006) using *Agrobacterium*  
466 *tumefaciens* strain C58C1. Twenty transformed plants from each line were analyzed by PCR. All  
467 cloning and analysis primers used are listed in Supplementary Table 1.

468

#### 469 **Expression analysis by qRT-PCR.**

470 Total RNA was extracted using ZR Plant RNA MiniPrep (ZymoResearch) kit. For miRNAs, cDNA  
471 synthesis was performed with 100 ng of total RNA using miScript Plant RT kit (Qiagen); qRT-  
472 PCR assays were done with SYBR Green PCR kit (Qiagen) following the manufacturer's  
473 instructions. LNA probes used for qRT-PCR to detect mature miRNAs were: miScript Primer  
474 Assay At\_miR822\_5p\_1 (5'UGCGGGAAGCAUUUGCACAUG) and as a control we used  
475 miScript Primer Assay At\_mir167\_5p\_1 (5'UGAAGCUGCCAGCAUGAUCUA). For the target  
476 genes AT5G02350, AT5G02330 and AT2G13900 cDNA was synthesized using M-MuLV Reverse  
477 Transcriptase (NEB) with 100 ng of total RNA at 42°C for 60 min, and 65°C for 20 min for  
478 inactivation. The thermal profile of qRT-PCR assays consisted of 95°C for 10 min, 40 cycles of  
479 95°C for 15 s, 60°C for 30 s and 72°C for 30 s. Each quantitative PCR (qRT-PCR) reaction was  
480 performed in a final volume of 10 µL, 5 µL of Maxima SYBR Green/ROX qPCR Master Mix  
481 (Thermo Scientific), 0.5 µL of each primer, forward and reverse (10 µM), 6 µL of RNase-free  
482 water and 1 µL of cDNA. For ovules we used 50 ng of total RNA for qPCR of target genes.  
483 Amplification of *UBIQUITIN* gene was used as control. All reactions were carried out in Eco.  
484 Illumina 1010180, and data analyzed using the EcoStudy Illumina software. To determine the

485 relative expression of each gene in different tissues we used the  $2^{-\Delta\Delta C_q}$  method. Each qRT-PCR  
486 reaction had three biological replicates for all tissues analyzed. Primers used for qRT-PCR assays  
487 are listed in Supplementary Table 1.

#### 488 **Whole-mount *in situ* Hybridization**

489 Whole mount hybridization was based on (Garcia-Aguilar *et al.*, 2005) with minor modifications.  
490 Inflorescences were fixed in 4% fresh paraformaldehyde in tubes of 1.5 mL and put into desiccator  
491 with a vacuum pump for 5 min. Tubes were then placed in continuous agitation for 3 h at room  
492 temperature. After fixation, the inflorescences were washed three times with 1X PBS.  
493 Inflorescences were rinsed in 50% ethanol, 25% ethanol, and diethyl pyrocarbonate (DEPC)-  
494 treated water for 5 min each. After removing all excess water, inflorescences were dissected with  
495 a hypodermic syringe and embedded in 15% acrylamide:bysacrilamide (29:1) over polysine slides  
496 (Thermo Scientific). Slides were treated with 150  $\mu$ L of 0.2 M HCl for 20 min at 25°C and  
497 subsequently washed three times: in DEPC-treated water, 1X PBS and DEPC-treated water.  
498 Samples were digested in 1  $\mu$ g/mL proteinase K for 30 min at 37°C in a humid environment.  
499 Digestion was stopped by washing serially in 1X PBS and 2 mg/mL of glycine for 2 min, samples  
500 were subsequently post-fixed in 4% paraformaldehyde for 20 min at 25°C in a humid environment.  
501 Slides were transferred into hybridization solution (6X standard saline citrate [SSC], 3% SDS, 50%  
502 formamide, and 0.1 mg/mL tRNA) at 55°C for 90 min in agitation. After pre-hybridization LNA  
503 probes were added into the hybridization solution and samples were maintained in a humid  
504 environment at 55°C for 16 h. After hybridization, slides were washed twice in 0.2X SSC–0.1%  
505 SDS at 55°C for 10 min, followed by a wash in 2X SSC for 2 min with gentle agitation. Slides  
506 were digested with RNase A (10  $\mu$ g/mL) in 2X SSC for 30 min at 37°C humid environment.  
507 Digestion was stopped by washing with 2X SSC for 2 min at 25°C. Final washes were conducted  
508 in 0.2X SSC–0.1% SDS at 55°C for 10 min in agitation, followed by a wash in 2X SSC for 2 min  
509 and a wash in 1X TBS (100 mM Tris-HCl [pH 7.5], 150 mM NaCl) for 2 min, both at 25°C with  
510 gentle agitation. Slides were incubated in 0.5% blotting-grade blocker (BioRad) for 2 h in TBS and  
511 subsequently rinsed in TBS for 2 min at 25°C with gentle agitation. For immunological detection,  
512 each slide without coverslip was incubated with 150  $\mu$ L of anti-digoxigenin–conjugated antibody  
513 (Abcam) diluted 1:1000 in 1% bovine serum albumin (BSA) in TBS for 2h at 4°C in a humid  
514 environment, followed by 4 washes for 10 min each in 0.5% BSA and 0.1% Triton X-100 with

515 gentle agitation. The slides were subsequently washed in buffer C with levamisole (100 mM Tris  
516 [pH 9.5], 50 mM MgCl<sub>2</sub>, 100 mM NaCl, 0.1% Tween 20, 1 mM levamisole) and incubated for 12-  
517 17 h in 0.34 mg/mL nitroterazolium blue chloride (Sigma Aldrich) in buffer C with levamisole in  
518 a humid environment, each slide was covered with a coverslip. Slides were observed in Normaski  
519 optics using a Leica microscope DM5000B.

## 520 **Cytological analysis**

521 For DIC microscopy, inflorescences were rinsed and fixed in FAA solution (10% formaldehyde,  
522 5% acetic acid, and 50% ethanol) for 24 h at 4°C. After fixation, samples were dehydrated in 70%  
523 ethanol at room temperature. Gynoecia from different stages of ovule development were dissected  
524 with hypodermic needles (BD Plastipack) and observed with a Stereomicroscope Leica EZ4 HD;  
525 then, ovules were cleared in Herr's solution (phenol:chloral hydrate: 85% lactic acid:xylene:clove  
526 oil in a 1:1:1:0.5:1 proportion), and observed in Normaski optics using a Leica microscope  
527 DM5000B. For MIR822 promoter expression analysis, fresh tissues were incubated in GUS  
528 staining solution (10 mM EDTA, 0.1% Triton X-100, 5 mM potassium ferrocyanide, 5 mM  
529 potassium ferricyanide, and 1 mg/mL of X-Gluc in 50 mM of phosphate buffer pH 7.4) for 24 h at  
530 37°C. After incubation, ovules were mounted in a solution of 20% glycerol and 20% of lactic acid.  
531 Confocal imaging was performed using Propidium Iodide (PI), inflorescences were fixed in FAA  
532 solution and dehydrated in 70% ethanol. Carpels were dissected to obtain ovules and were stained  
533 in 1 mg/mL of PI for 6 h at room temperature, ovules were mounted and observed using the Laser  
534 Scanning Confocal Microscope (LSCM) Leica TCS SP8.

535

536

## 537 **ACKNOWLEDGMENTS**

538 Research in the laboratory of NVDF was supported by grant from Consejo Nacional de Ciencia y  
539 Tecnologia (CONACyT-184245). Grants 20182227 and 20196284 to NVDF from Instituto  
540 Politécnico Nacional through Secretaría de Investigación y Posgrado (SIP-IPN) financed part of  
541 this research. We thank Dr. Maria del Carmen Oliver Salvador for all her enthusiasm, motivation  
542 and discussion during the project. We also would like to thank all undergraduate students who  
543 participated in cloning and growing plants. ATA was financially supported by CONACyT and IPN  
544 scholarships during her PhD studies.

545

546 **REFERENCES**

547

548 **Addo-Quaye, C., Eshoo, T.W., Bartel, D.P. and Axtell, M.J.** (2008) Endogenous siRNA and  
549 miRNA targets identified by sequencing of the Arabidopsis degradome. *Current Biology*,  
550 **18**, 758-762.

551 **Armenta-Medina, A. and Gillmor, C.S.** (2019) An Introduction to Methods for Discovery and  
552 Functional Analysis of MicroRNAs in Plants. *Methods Mol Biol*, **1932**, 1-14.

553 **Bachelier, J.B. and Friedman, W.E.** (2011) Female gamete competition in an ancient  
554 angiosperm lineage. *Proc Natl Acad Sci U S A*, **108**, 12360-12365.

555 **Bajon, C., Horlow, C., Motamayor, J.C., Sauvanet, A. and Robert, D.** (1999)  
556 Megasporogenesis in Arabidopsis thaliana L.: an ultrastructural study. *Sex Plant Reprod*,  
557 **12**, 99-109.

558 **Benkovics, A.H. and Timmermans, M.C.** (2014) Developmental patterning by gradients of  
559 mobile small RNAs. *Curr Opin Genet Dev*, **27**, 83-91.

560 **Bologna, N.G., Iselin, R., Abriata, L.A., Sarazin, A., Pumplin, N., Jay, F., Greutzinger, T.,**  
561 **Dal Peraro, M. and Voinnet, O.** (2018) Nucleo-cytosolic Shuttling of ARGONAUTE1  
562 Prompts a Revised Model of the Plant MicroRNA Pathway. *Mol Cell*, **69**, 709-719 e705.

563 **Cao, L., Wang, S., Venglat, P., Zhao, L., Cheng, Y., Ye, S., Qin, Y., Datla, R., Zhou, Y. and**  
564 **Wang, H.** (2018) Arabidopsis ICK/KRP cyclin-dependent kinase inhibitors function to  
565 ensure the formation of one megaspore mother cell and one functional megaspore per  
566 ovule. *PLoS Genet*, **14**, e1007230.

567 **Chavez Montes, R.A., de Fatima Rosas-Cardenas, F., De Paoli, E., Accerbi, M., Rymarquis,**  
568 **L.A., Mahalingam, G., Marsch-Martinez, N., Meyers, B.C., Green, P.J. and de**  
569 **Folter, S.** (2014) Sample sequencing of vascular plants demonstrates widespread  
570 conservation and divergence of microRNAs. *Nat Commun*, **5**, 3722.

571 **Cheng, C.Y., Mathews, D.E., Schaller, G.E. and Kieber, J.J.** (2013) Cytokinin-dependent  
572 specification of the functional megaspore in the Arabidopsis female gametophyte. *Plant J*,  
573 **73**, 929-940.

574 **Citterio, S., Albertini, E., Varotto, S., Feltrin, E., Soattin, M., Marconi, G., Sgorbati, S.,**  
575 **Lucchin, M. and Barcaccia, G.** (2005) Alfalfa Mob1-like genes are expressed in  
576 reproductive organs during meiosis and gametogenesis. *Plant Molecular Biology*, **58**,  
577 789-807.

578 **D'Ippolito, S., Arias, L.A., Casalongue, C.A., Pagnussat, G.C. and Fiol, D.F.** (2017) The  
579 DC1-domain protein VACUOLELESS GAMETOPHYTES is essential for development  
580 of female and male gametophytes in Arabidopsis. *Plant J*, **90**, 261-275.

581 **Demesa-Arevalo, E. and Vielle-Calzada, J.P.** (2013) The classical arabinogalactan protein  
582 AGP18 mediates megaspore selection in Arabidopsis. *Plant Cell*, **25**, 1274-1287.

583 **Drews, G.N. and Koltunow, A.M.** (2011) The female gametophyte. *Arabidopsis Book*, **9**, e0155.

584 **Duran-Figueroa, N. and Vielle-Calzada, J.P.** (2010) ARGONAUTE9-dependent silencing of  
585 transposable elements in pericentromeric regions of Arabidopsis. *Plant Signal Behav*, **5**,  
586 1476-1479.

587 **Erbasol Serbes, I., Palovaara, J. and Gross-Hardt, R.** (2019) Development and function of the  
588 flowering plant female gametophyte. *Curr Top Dev Biol*, **131**, 401-434.

- 589 **Gao, S., Yang, L., Zeng, H.Q., Zhou, Z.S., Yang, Z.M., Li, H., Sun, D., Xie, F. and Zhang, B.**  
590 (2016) A cotton miRNA is involved in regulation of plant response to salt stress. *Sci Rep*,  
591 **6**, 19736.
- 592 **Garcia-Aguilar, M., Dorantes-Acosta, A., Perez-Espana, V. and Vielle-Calzada, J.P.** (2005)  
593 Whole-mount in situ mRNA localization in developing ovules and seeds of Arabidopsis.  
594 *Plant Mol Biol Rep*, **23**, 279-289.
- 595 **Haig, D.** (1990) New Perspectives on the Angiosperm Female Gametophyte. *Botanical Review*,  
596 **56**, 236-274.
- 597 **Haig, D.** (2020) Poles Apart: Monosporic, Bisporic, and Tetrasporic Embryo Sacs Revisited.  
598 *Front. Ecol. Evol.* , **8**.
- 599 **Havecker, E.R., Wallbridge, L.M., Hardcastle, T.J., Bush, M.S., Kelly, K.A., Dunn, R.M.,**  
600 **Schwach, F., Doonan, J.H. and Baulcombe, D.C.** (2010) The Arabidopsis RNA-  
601 directed DNA methylation argonautes functionally diverge based on their expression and  
602 interaction with target loci. *Plant Cell*, **22**, 321-334.
- 603 **Hernandez-Lagana, E., Rodriguez-Leal, D., Lua, J. and Vielle-Calzada, J.P.** (2016) A  
604 Multigenic Network of ARGONAUTE4 Clade Members Controls Early Megaspore  
605 Formation in Arabidopsis. *Genetics*, **204**, 1045-1056.
- 606 **Huang, B.Q. and Russell, S.D.** (1992) Female Germ Unit - Organization, Isolation, and  
607 Function. *International Review of Cytology-a Survey of Cell Biology*, **140**, 233-293.
- 608 **Hwang, I.S., Choi, D.S., Kim, N.H., Kim, D.S. and Hwang, B.K.** (2014) The pepper  
609 cysteine/histidine-rich DC1 domain protein CaDC1 binds both RNA and DNA and is  
610 required for plant cell death and defense response. *New Phytol*, **201**, 518-530.
- 611 **Ingram, G.C.** (2017) Dying to live: cell elimination as a developmental strategy in angiosperm  
612 seeds. *J Exp Bot*, **68**, 785-796.
- 613 **Kapil, R.N. and Bhatnagar, A.K.** (1981) Ultrastructure and Biology of Female Gametophyte in  
614 Flowering Plants. *International Review of Cytology*, **70**, 291-341.
- 615 **Klimyuk, V.I. and Jones, J.D.** (1997) AtDMC1, the Arabidopsis homologue of the yeast DMC1  
616 gene: characterization, transposon-induced allelic variation and meiosis-associated  
617 expression. *Plant J*, **11**, 1-14.
- 618 **Liu, H., Yu, H., Tang, G. and Huang, T.** (2018) Small but powerful: function of microRNAs in  
619 plant development. *Plant Cell Rep*, **37**, 515-528.
- 620 **Liu, L. and Chen, X.** (2018) Intercellular and systemic trafficking of RNAs in plants. *Nat*  
621 *Plants*, **4**, 869-878.
- 622 **Murashige, T. and Skoog, F.** (1962) A revised medium for rapid growth and bioassays with  
623 tobacco tissue culture. *Physiologia Plantarum*, **15**, 473-497.
- 624 **Nonomura, K.I.** (2018) Small RNA pathways responsible for non-cell-autonomous regulation of  
625 plant reproduction. *Plant Reprod*, **31**, 21-29.
- 626 **Olmedo-Monfil, V., Duran-Figueroa, N., Arteaga-Vazquez, M., Demesa-Arevalo, E.,**  
627 **Autran, D., Grimanelli, D., Slotkin, R.K., Martienssen, R.A. and Vielle-Calzada, J.P.**  
628 (2010) Control of female gamete formation by a small RNA pathway in Arabidopsis.  
629 *Nature*, **464**, 628-632.
- 630 **Pinto, S.C., Mendes, M.A., Coimbra, S. and Tucker, M.R.** (2019) Revisiting the Female  
631 Germline and Its Expanding Toolbox. *Trends Plant Sci*, **24**, 455-467.
- 632 **Rodkiewicz, B.** (1970) Callose in cell walls during megasporogenesis in angiosperms. *Planta*,  
633 **93**, 39-47.

- 634 **Rodriguez-Leal, D., Leon-Martinez, G., Abad-Vivero, U. and Vielle-Calzada, J.P.** (2015)  
635 Natural variation in epigenetic pathways affects the specification of female gamete  
636 precursors in Arabidopsis. *Plant Cell*, **27**, 1034-1045.
- 637 **Sanchez-Leon, N., Arteaga-Vazquez, M., Alvarez-Mejia, C., Mendiola-Soto, J., Duran-**  
638 **Figuroa, N., Rodriguez-Leal, D., Rodriguez-Arevalo, I., Garcia-Campayo, V.,**  
639 **Garcia-Aguilar, M., Olmedo-Monfil, V., Arteaga-Sanchez, M., de la Vega, O.M.,**  
640 **Nobuta, K., Vemaraju, K., Meyers, B.C. and Vielle-Calzada, J.P.** (2012)  
641 Transcriptional analysis of the Arabidopsis ovule by massively parallel signature  
642 sequencing. *J Exp Bot*, **63**, 3829-3842.
- 643 **Schmidt, A., Schmid, M.W. and Grossniklaus, U.** (2015) Plant germline formation: common  
644 concepts and developmental flexibility in sexual and asexual reproduction. *Development*,  
645 **142**, 229-241.
- 646 **Schneitz, K., Hulskamp, M. and Pruitt, R.E.** (1995) Wild-type ovule development in  
647 Arabidopsis thaliana: a light microscope study of cleared whole-mount tissue. *The Plant*  
648 *Journal*, **7**, 731-749.
- 649 **Seeliger, K., Dukowic-Schulze, S., Wurz-Wildersinn, R., Pacher, M. and Puchta, H.** (2012)  
650 BRCA2 is a mediator of RAD51- and DMC1-facilitated homologous recombination in  
651 Arabidopsis thaliana. *New Phytol*, **193**, 364-375.
- 652 **Shao, C.G., Wu, Q.E., Qiu, J.J., Jin, S.H., Zhang, B.L., Qian, J., Chen, M. and Meng, Y.J.**  
653 (2013) Identification of novel microRNA-like-coding sites on the long-stem microRNA  
654 precursors in Arabidopsis. *Gene*, **527**, 477-483.
- 655 **Tucker, M.R. and Koltunow, A.M.** (2014) Traffic monitors at the cell periphery: the role of cell  
656 walls during early female reproductive cell differentiation in plants. *Curr Opin Plant Biol*,  
657 **17**, 137-145.
- 658 **Tucker, M.R., Okada, T., Hu, Y., Scholefield, A., Taylor, J.M. and Koltunow, A.M.** (2012)  
659 Somatic small RNA pathways promote the mitotic events of megagametogenesis during  
660 female reproductive development in Arabidopsis. *Development*, **139**, 1399-1404.
- 661 **Webb, M.C. and Gunning, B.E.S.** (1990) Embryo Sac Development in Arabidopsis-Thaliana .1.  
662 Megasporogenesis, Including the Microtubular Cytoskeleton. *Sexual Plant Reproduction*,  
663 **3**, 244-256.
- 664 **Yang, W.C. and Sundaresan, V.** (2000) Genetics of gametophyte biogenesis in Arabidopsis.  
665 *Current Opinion in Plant Biology*, **3**, 53-57.
- 666 **Zhang, X.R., Henriques, R., Lin, S.S., Niu, Q.W. and Chua, N.H.** (2006) Agrobacterium-  
667 mediated transformation of Arabidopsis thaliana using the floral dip method. *Nat Protoc*,  
668 **1**, 641-646.
- 669 **Zhou, X., Ruan, J., Wang, G. and Zhang, W.** (2007) Characterization and identification of  
670 microRNA core promoters in four model species. *PLoS Comput Biol*, **3**, e37.  
671  
672
